# Supplementary material for: Development and validation of an interpretable model integrating multimodal information for improving ovarian cancer diagnosis
Source: PubMed Central journal article supplement (PMC10973484; doi:10.1038/s41467-024-46700-2), 2024-03-27
Supplement: 41467_2024_46700_MOESM1_ESM.pdf [file 41467_2024_46700_MOESM1_ESM.pdf]

# **Development and Validation of an Interpretable Model Integrating Multimodal Information for Improving Ovarian Cancer Diagnosis**

**Xiang et al**

| <b>Supplementary Table 1. The performances of different models in patient level.</b>                                                                                                                                                                                           |                     |                     |                     |                      |                        |                        |                     |
|--------------------------------------------------------------------------------------------------------------------------------------------------------------------------------------------------------------------------------------------------------------------------------|---------------------|---------------------|---------------------|----------------------|------------------------|------------------------|---------------------|
| <b>Internal test set</b>                                                                                                                                                                                                                                                       | <b>DenseNet121</b>  | <b>DenseNet169</b>  | <b>DenseNet201</b>  | <b>ResNet34</b>      | <b>EfficientNet_b5</b> | <b>EfficientNet_b6</b> | <b>Ensemble</b>     |
| AUC                                                                                                                                                                                                                                                                            | 0.923(0.904, 0.944) | 0.915(0.895, 0.931) | 0.911(0.891, 0.929) | 0.898 (0.874, 0.924) | 0.915(0.898, 0.932)    | 0.911(0.888, 0.930)    | 0.970(0.934, 0.993) |
| Sensitivity (%)                                                                                                                                                                                                                                                                | 79.4(75.4, 83.2)    | 84.5(80.9, 87.7)    | 83.5(79.9, 87.0)    | 80.7(76.9, 85.0)     | 89.2(86.0, 92.2)       | 83.2(79.7, 86.7)       | 86.7(78.7, 94.7)    |
| Specificity (%)                                                                                                                                                                                                                                                                | 91.6(88.2, 94.6)    | 85.9(81.8, 89.9)    | 86.9(83.2, 90.6)    | 85.2(80.8, 89.2)     | 77.2(72.4, 81.5)       | 85.6(81.1, 89.2)       | 98.1(94.3, 100.0)   |
| Accuracy (%)                                                                                                                                                                                                                                                                   | 84.6(81.9, 86.9)    | 85.1(82.5, 87.8)    | 84.9(82.3, 87.6)    | 82.6(79.9, 85.3)     | 84.1(81.2, 86.5)       | 84.2(81.3, 87.1)       | 91.5(86.7, 96.1)    |
| PPV (%)                                                                                                                                                                                                                                                                        | 92.7(90.1, 95.3)    | 88.9(86.2, 91.8)    | 89.5(86.9, 92.3)    | 88.0(85.0, 91.0)     | 84.0(81.3, 86.7)       | 88.5(85.5, 91.3)       | 98.5(95.5, 100.0)   |
| NPV (%)                                                                                                                                                                                                                                                                        | 76.9(73.4, 80.1)    | 80.5(77.0, 84.1)    | 79.7(76.1, 83.6)    | 76.7(73.1, 80.7)     | 84.2(80.1, 88.0)       | 79.2(75.5, 83.0)       | 84.1(76.8, 92.7)    |
| <b>External test set</b>                                                                                                                                                                                                                                                       |                     |                     |                     |                      |                        |                        |                     |
| AUC                                                                                                                                                                                                                                                                            | 0.806(0.787, 0.825) | 0.817(0.792, 0.838) | 0.818(0.795, 0.840) | 0.821(0.803, 0.845)  | 0.848(0.825, 0.865)    | 0.851(0.831, 0.869)    | 0.893(0.850, 0.931) |
| Sensitivity (%)                                                                                                                                                                                                                                                                | 76.0(72.4, 79.6)    | 73.6(70.2, 77.1)    | 67.1(62.7, 71.3)    | 79.8(76.7, 83.1)     | 79.3(75.6, 82.9)       | 72.2(68.7, 75.8)       | 77.8(66.7, 86.4)    |
| Specificity (%)                                                                                                                                                                                                                                                                | 71.5(69.4, 73.7)    | 75.8(73.7, 77.9)    | 82.5(80.5, 84.6)    | 71.4(69.4, 73.5)     | 74.4(72.1, 76.4)       | 83.8(82.0, 85.4)       | 89.5(86.3, 92.8)    |
| Accuracy (%)                                                                                                                                                                                                                                                                   | 72.6(71.0, 74.6)    | 75.3(73.5, 77.1)    | 78.7(76.9, 80.5)    | 73.5(71.8, 75.3)     | 75.6(73.8, 77.2)       | 80.9(79.4, 82.5)       | 87.1(84.0, 90.2)    |
| PPV (%)                                                                                                                                                                                                                                                                        | 47.1(45.1, 49.5)    | 50.4(48.0, 53.0)    | 56.2(53.1, 59.5)    | 48.2(46.2, 50.3)     | 50.8(48.4, 52.9)       | 59.7(57.0, 62.6)       | 66.3(59.4, 74.4)    |
| NPV (%)                                                                                                                                                                                                                                                                        | 89.9(88.6, 91.3)    | 89.6(88.4, 90.9)    | 88.3(87.0, 89.6)    | 91.4(90.2, 92.7)     | 91.5(90.1, 92.9)       | 90.0(88.9, 91.3)       | 93.8(91.2, 96.0)    |
| <p>Note: Data in parentheses are 95% confidence intervals; AUC, area under the receiver operating characteristic curve; PPV, positive predictive value; NPV, negative predictive value. Cut-off thresholds of each model are corresponding to the maximum of Youden index.</p> |                     |                     |                     |                      |                        |                        |                     |
